# Supplementary material for: An RNA-sequencing transcriptome of the rodent Schwann cell response to peripheral nerve injury
Source: Springer Nature journal article supplement (doi:10.1186/s12974-022-02462-6), 2022-04-30

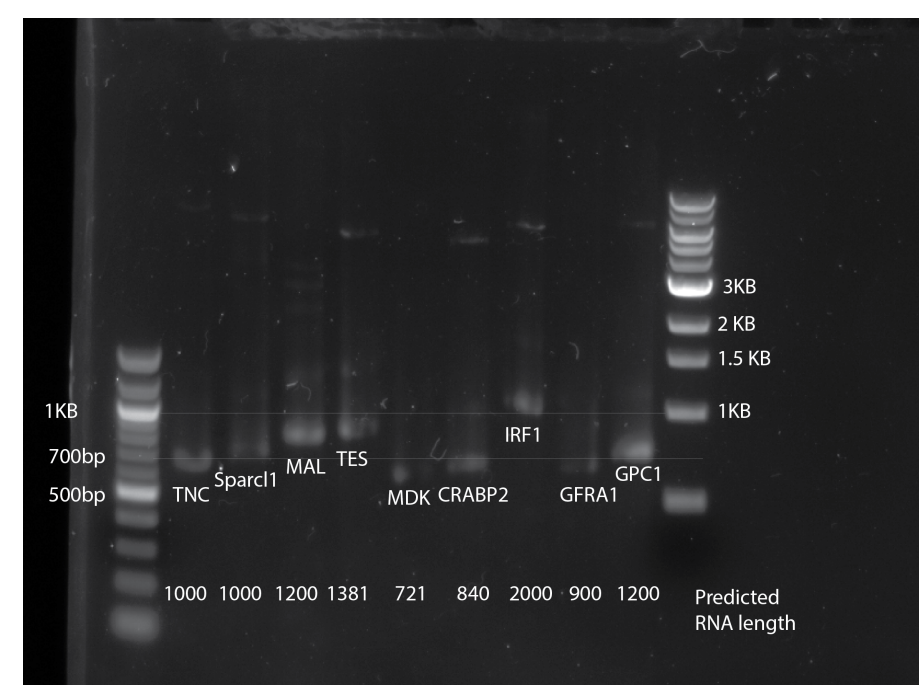

Supplement: MOESM2 [file 20363452]
